# Supplementary material for: Feasibility of a smartphone app to enhance physical activity in progressive MS: a pilot randomized controlled pilot trial over three months
Source: PeerJ journal article supplement (doi:10.7717/peerj.9303), 2020-06-23
Supplement: PIA_201910_CONSORT_Checklist.pdf [file PIA_201910_CONSORT_Checklist.pdf]

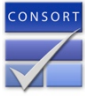

## CONSORT 2010 checklist of information to include when reporting a pilot or feasibility randomized trial in a journal or conference abstract

| Item               | Description                                                                                                 | Reported on line number |
|--------------------|-------------------------------------------------------------------------------------------------------------|-------------------------|
| Title              | Identification of study as randomised pilot or feasibility trial                                            | 1                       |
| Authors *          | Contact details for the corresponding author                                                                | 3-28                    |
| Trial design       | Description of pilot trial design (eg, parallel, cluster)                                                   | 1                       |
| Methods            |                                                                                                             |                         |
| Participants       | Eligibility criteria for participants and the settings where the pilot trial was conducted                  | 106-111                 |
| Interventions      | Interventions intended for each group                                                                       | 103-106                 |
| Objective          | Specific objectives of the pilot trial                                                                      | 97-99                   |
| Outcome            | Prespecified assessment or measurement to address the pilot trial objectives**                              | 133-136                 |
| Randomization      | How participants were allocated to interventions                                                            | 103                     |
| Blinding (masking) | Whether or not participants, care givers, and those assessing the outcomes were blinded to group assignment | 113-114                 |
| Results            |                                                                                                             |                         |
| Numbers randomized | Number of participants screened and randomised to each group for the pilot trial objectives**               | 114 / Figure 1          |
| Recruitment        | Trial status†                                                                                               | Not applicable          |
| Numbers analysed   | Number of participants analysed in each group for the pilot objectives**                                    | 114 / Figure 1          |
| Outcome            | Results for the pilot objectives, including any expressions of uncertainty**                                | 204-212                 |
| Harms              | Important adverse events or side effects                                                                    | Not applicable          |
| Conclusions        | General interpretation of the results of pilot trial and their implications for the future definitive trial | 291-295                 |
| Trial registration | Registration number for pilot trial and name of trial register                                              | 102                     |
| Funding            | Source of funding for pilot trial                                                                           | PeerJ section           |

*\*this item is specific to conference abstracts*

*\*\*Space permitting, list all pilot trial objectives and give the results for each. Otherwise, report those that are a priori agreed as the most important to the decision to proceed with the future definitive RCT.*

*†For conference abstracts.*
